# Supplementary material for: A post-processed carbon flux dataset for 34 eddy covariance flux sites across the Heihe River Basin, China
Source: Copernicus journal article supplement (doi:10.5194/essd-2024-370), 2024-11-08
Supplement: Supplementary file [file essd-2024-370-AC1-supplement.pdf]

## Response to reviewers' comments (Paper # essd-2024-370)

We have fully considered the reviewer's comments during the revision and have improved the manuscript accordingly. We summarize our responses point by point below in blue. The revised places are highlighted in yellow background in the revised manuscript.

Reviewer comments:

The study "*Post-processed carbon flux dataset for 34 eddy covariance flux sites across the Heihe River Basin, China*" presents a post-processed carbon flux dataset derived from 34 eddy covariance (EC) sites in the Heihe River Basin, China. This dataset is expected to be invaluable for studying carbon cycling in arid regions and Asia, where substantial data gaps exist due to limited FLUXNET observations and data sharing. I strongly support the publication of this study, pending minor revisions as outlined below:

Response: We thank the reviewer for the positive evaluation of our manuscript.

**Line 26:** Please clarify the term "multi-year observation" to help readers quickly determine the applicability of the dataset to their research.

Response: We have revised the "multi-year observation" to "multi-year observation during 2008-2022".

**Abstract:** Adding a data access portal at the end of the abstract is recommended to facilitate wider use of this dataset.

Response: As per your recommendation, we have included the data access portal at the end of the abstract.

**Line 191:** Check the time format—before 12:00 should be labeled "AM." Alternatively, consider removing "AM" and "PM" entirely since a 24-hour format is already used.

Response: Thank you for the suggestions. We have updated the time format to the 24-hour format and revised it accordingly throughout the manuscript.

**Figure 7:** It is suggested to translate the X-axis labels from DOY (Day of Year) to specific month names for better readability.

Response: Thank you for the suggestions. We have revised the X-axis labels of Fig.7.

**Line 243:** The statement "The Reco in the HRB slightly increased for cropland and wetlands but remained relatively stable for other ecosystem types over the last decade" appears inconsistent with Figure 8c, which shows that Reco in cropland and wetlands is declining. Please clarify.

Response: Thank you to the reviewer for kindly pointing this out. We made a typographical error here: the Reco slightly decreased for croplands and wetlands, as shown in Figure 8c.

**Lines 262–263:** Regarding the claim, "The GPP, Reco, and NEE are significantly higher at DMS,

YKe, GTa, and ZYW than at others," how do the authors explain the behavior of Reco at the Arou station?

Response: Thank you for your comments. The ARo site is unique, exhibiting high GPP and Reco but low NEE. We guess that it may be attributed to the high soil organic content at this location. And need further study to confirm. For the YKe, DMS, GTa, and ZYW sites, which represent cropland, forest, and wetland ecosystems, they demonstrate high GPP, Reco, and NEE. We have also revised Figure 9 to use a consistent value range for the three carbon fluxes, which makes it easier to read.

**Lines 323–325:** The text states, "While previous studies have reported that MDS may systematically overestimate carbon emissions and underestimate CO<sub>2</sub> sequestration (Vekuri et al., 2023), we did not observe this phenomenon in the HRB." Please elaborate on how this result was derived.

Response: In a previous study (Vekuri et al., 2023), it was reported that the MDS method could introduce significant errors in carbon balance estimates. In this study, we also evaluated the performance of the MDS method by introducing artificial gaps into the NEE observations. Our results did not reveal any systematic errors in the gap-filled data generated using the MDS method, as illustrated in Fig. 4.

**Line 331:** The statement "Since direct measurement of GPP and Reco are not available, assessing uncertainties in the NEE partitioning step remains challenging" should be revised as there are indeed methods for directly measuring Reco, such as the chamber technique.

Response: Thank you for your comments. We agree that the original statement is not rigorous. For ecosystems with short vegetation, Reco can be measured using chamber techniques. However, for ecosystems with tall vegetation, such as forests, measuring Reco is challenging. Accordingly, we have revised the statement to:

"Since direct measurements of GPP and Reco are difficult, especially in ecosystems with tall vegetation, assessing uncertainties in the NEE partitioning process remains challenging."
